# Supplementary material
Source: Research Square preprint supplement (doi:10.21203/rs.3.rs-9908162/v1)
Supplement: Supplementary file 1 [file 82d94d2df76ef10fa6f290d2.docx]

**Supplementary information**

# Materials and Methods

Time-lapse cellular Ca2+ measurements

GL261 and glial cells were seeded at 5,000 cells/well in 96-well plates (n = 6), allowed to adhere overnight, and incubated for 30 min at 37 °C with 5 µM Fluo4-AM (Thermo Fisher Scientific) to assess intracellular Ca²⁺ levels in Krebs buffer (KB; 140 mM NaCl, 5.9 mM KCl, 1.2 mM MgCl₂, 15 mM HEPES, pH 7.4) supplemented with 10 mM D-glucose and 2.5 mM CaCl₂. After incubation, probe solution was replaced with fresh KB, and a 5-min baseline fluorescence was recorded (Varioskan™ LUX, 485/535 nm). Cells were irradiated (FLASH or CONV) and monitored for 2 h. Untreated cells were controls. At 125 min, 5 µM Ionomycin induced a maximal Ca²⁺ influx. Irradiated medium-only controls were included, quantified, and evaluated during the initial Ca2+ and ROS kinetic experiments and considered negligible in the context of the overall cellular Ca2+ responses.

Clonogenic survival assay

GL261 cells were seeded at 300 cells/well in 6-well plates (3 wells per condition) and allowed to adhere overnight. Cells were then exposed to single radiation doses of 4, 6, or 8 Gy, while non-irradiated cells (0 Gy) were used to determine plating efficiency. Following irradiation, cells were maintained under standard culture conditions for 9 days to allow colony formation. At the end of the incubation period, colonies were fixed with methanol and stained with 0.5% crystal violet. Colonies consisting of ≥ 50 cells were counted manually using brightfield microscopy. The surviving fraction was calculated as the ratio between the number of colonies formed after irradiation and the number of cells seeded, normalized to the plating efficiency of the non-irradiated control. The survival curve was generated by plotting the surviving fraction against radiation dose (Gy). The half-maximal inhibitory dose (IC₅₀) was determined by fitting the survival data using the linear-quadratic model, and defined as the radiation dose required to reduce the surviving fraction to 0.5.

**Determination of cell injury**

GL261 and glial cells were seeded at 35,000 and 50.000 cells/well in 24-well plates, respectively (3 wells per condition), and adhered overnight. After irradiation (FLASH or CONV) or no treatment, cells were fixed with 4% paraformaldehyde and stained with Hoechst 33258. Images were acquired with a Zeiss Axio Vert.A1 or Zeiss LSM900 confocal microscope (Airyscan 2) and analyzed with ImageJ. Cell injury was quantified as the percentage of cells with condensed or fragmented nuclei. Cell density and nuclear diameter were also assessed.

**Figure Legends**

**Fig. 1** (c) *p values: p = 0.0426 (FLASH), p < 0.0001 (CONV); #p = 0.0003. (d) *p < 0.0001 (FLASH; CONV); #p < 0.0001. (f) p53 *p: p = 0.0071 (6 h, FLASH), p = 0.0011 (1 h, CONV), p = 0.0078 (6 h, CONV); #p = 0.0016 (1 h). p21 *p: p < 0.0001 (1, 6 h, FLASH), p = 0.0002 (6 h, CONV; 24 h, FLASH), p = 0.05 (24, 72 h, CONV), p = 0.0176 (72 h, FLASH); #p: p = 0.0003 (1 h), p = 0.0149 (6 h), p = 0.0077 (24 h). p16 #p: p = 0.0068 (1 h).

**Fig. 2** (b) *p: p = 0.0022 (FLASH), p < 0.0001 (CONV); #p < 0.0001. (c) *p: p < 0.0001 (FLASH; CONV); #p: p = 0.0078; (d) *p: p < 0,0001 (FLASH; CONV); (e - g) *Bax*: *p: p = 0.0080 (1 h, FLASH), p = 0.0203 (1 h, CONV), p = 0.0021 (72 h, CONV); $p: p = 0.0295 (24 h), p = 0.0220 (72 h). *Bcl-2*: *p: p = 0.0021 (24 h, FLASH); $p: p = 0.0080 (24 h). *p53*: *p: p = 0.0490 (0, FLASH), p = 0.0144 (1 h, FLASH), p = 0.0467 (24 h, FLASH); $p: p = 0.05 (24, 72 h). *p21*: *p: p = 0.0005 (0, FLASH), p = 0.0043 (1 h, FLASH), p < 0.0001 (24 h, FLASH); p = 0.0064 (72 h, CONV); $p: p = 0.0021 (0), p = 0.0361 (1 h), p < 0.0001 (24 h), p = 0.0132 (72 h). *p16*: *p: p = 0.0002 (24 h, FLASH), p = 0.0064 (24 h, CONV). *LC3*: *p: p = 0.0392 (0, FLASH), p = 0.05 (1 h, CONV) p = 0.0146 (24 h, FLASH), p = 0.0237 (24 h, CONV), p = 0.0031 (72 h, CONV), $p: p = 0.0002 (24 h), p = 0.0074 (72 h). *p: p = 0.0049 (0, FLASH); $p: p = 0.0048 (72 h).

(i) 24 h: G0/G1 phase *p: p < 0.0001 (FLASH; CONV); #p < 0.0001; S phase *p: p < 0,0001 (FLASH; CONV); #p = 0.0352; G2/M phase *p: p < 0.0001 (FLASH; CONV), #p = 0.0006 (CONV); 72 h: G0/G1 phase *p: p < 0.0001 (FLASH; CONV); #p < 0.0001; S phase *p: p = 0.0003 (FLASH); #p = 0,0002; G2/M phase *p: p < 0.0001 (FLASH; CONV).

**Fig. 3** (a - h) For astrocytes: MitoTracker Green: *p: p = 0.0008 (24 h, Control), p < 0.0001 (72 h, Control; 1, 6, 24 h, FLASH; 6, 72 h, CONV), p = 0.0024 (1h, CONV); #p: p < 0.0001 (1, 6, 24, 72 h, FLASH; 1, 6, 24, 72 h, CONV); $p: p < 0.001 (24 h), p = 0.005 (72h) (a). Mito Tracker Red CMXROS: *p: p < 0.0001 (1, 6, 72 h, Control; 1, 6, 72 h, FLASH), p = 0.001 (1 h, CONV), p = 0.0005 (24 h, FLASH); #p: p < 0.0001 (1, 6, 24, 72 h, FLASH; 1, 6, 72 h, CONV); $p: p = 0.0003 (6 h), p = 0.0153 (24h) (b). TMRM: *p: p < 0.0001 (24, 72 h, Control; 1, 24, 72 h, FLASH; 1, 24, 72 h, CONV), p = 0.0166 (6 h, FLASH); #p: p < 0.0001 (1, 6, 24, 72 h, FLASH; 1, 6, 24, 72 h, CONV); $p: p = 0.0361 (72 h) (c). CellROX: *p: p < 0.0001 (72 h, Control; 24 h, FLASH; 24 h, CONV), p = 0.0118 (6 h, FLASH), p = 0.0348 (6 h, CONV); #p: p = 0.0097 (6 h, FLASH), p = 0.0288 (6 h, CONV), p < 0.001 (24, 72 h, FLASH; 24, 72 h, CONV); $p: p = 0.05 (24 h) (d). For GL261 cells: MitoTracker Green: *p: p < 0.0001 (1, 6, 24, 72 h, Control; 1, 6, 24, 72 h, FLASH; 1, 6, 24, 72 h, CONV); #p: p < 0.0001 (6, 24, 72 h, FLASH; 6, 24, 72 h, CONV) (e). MitoTracker Red CMXROS: *p: p < 0.0001 (1, 6, 24, 72 h, Control; 24, 72 h, FLASH; 1, 24, 72 h, CONV); p = 0.0156 (6h, CONV); #p: p < 0.0001 (1, 6 h, FLASH; 6 h, CONV), p = 0.0041 (24 h, FLASH; 24 h, CONV); $p: p < 0.0001 (1 h) (f). TMRM: *p: p < 0.0001 (6, 24, 72 h, Control; 6, 24, 72 h, FLASH; 6, 24, 72 h, CONV); #p: p = 0.0198 (1 h, FLASH), p < 0.0001 (6, 24 h, FLASH; 6, 24, 72 h, CONV); $p: p = 0.003 (1 h), p < 0.001 (6, 24, 72 h) (g). CellROX: *p: p < 0.0001 (1, 6, 72 h, Control; 6, 24, 72 h, FLASH; 1, 6, 24, 72 h, CONV); #p: p = 0.0075 (1 h, FLASH), p < 0.0001 (6, 24, 72 h, FLASH; 6, 24, 72 h, CONV); $p: p = 0.005 (1 h), p = 0.0010 (6 h), p = 0.0003 (24 h) (h).

**Fig.4** Untreated: *p: p < 0.0001(BR, ATP-linked, FLASH; SRC, CONV), p = 0.0435 (BR, CONV), p = 0.0078 (MR, FLASH), p = 0.0030 (MR, CONV), p = 0.0075 (NMR, FLASH), p = 0.0469 (NMR, CONV); #p: p = 0.0050 (BR), p = 0.0075 (ATP- linked), p = 0.0008 (SRC) (a); + DPQ: *p: p = 0.0043 (BR, FLASH), p < 0.0001 (ATP-linked, MR, FLASH; BR, ATP-linked, CONV), p = 0.0017 (MR, CONV), p = 0.0357 (SRC, FLASH), p = 0.0412 (SRC, CONV), p = 0.0004 (NMR, FLASH), p = 0.0104 (NMR, CONV); #p: p = 0.0281 (BR), p < 0.0001 (ATP- linked, MR, NMR), p = 0.0004 (SRC) (b); + zVAD: *p: p < 0.0001(BR, ATP-linked, MR, NMR, FLASH), p = 0.0356 (MR, CONV), p = 0.0005 (SRC, FLASH), p = 0.0146 (SRC, CONV), p = 0.0130 (NMR, CONV); #p: p = 0.0001 (BR), p = 0.0006 (ATP- linked), p = 0.0147 (MR), p < 0.0001 (NMR) (c); + Nec-1: *p: p = 0.0020 (BR, FLASH), p = 0.0030 (ATP-linked, FLASH), p = 0.0019 (MR, FLASH), p = 0.0109 (SRC, FLASH), p < 0.0001(NMR, FLASH); #p: p = 0.0001 (BR, MR), p < 0.0001 (ATP- linked, NMR), p = 0.0065 (SRC) (d); + Calp: *p: p = 0.0450 (BR, FLASH), p = 0.0028 (MR, FLASH), p = 0.0012 (SRC, FLASH), p < 0.0001(NMR, FLASH); #p: p = 0.0018 (BR), p = 0.0019 (ATP- linked), p = 0.0003 (MR), p = 0.0004 (SRC), p < 0.0001 (NMR) (e).

**Fig.5** Untreated: *p: p < 0.0001(BR, FLASH), p< 0.0001 (BR, CONV), p < 0.0001(ATP-linked, FLASH; ATP-linked, CONV), p < 0.0001 (MR, FLASH), p = 0.0017 (MR, CONV), p = 0.0357 (SRC, FLASH), p = 0.0412 (SRC, CONV), p = 0.0004 (NMR, FLASH), p = 0.0104 (NMR, CONV); #p: p = 0.0281 (BR), p < 0.0001 (ATP- linked), p = 0.0004 (MR) (a); + DPQ: *p: p = 0.0307 (MR, CONV), p = 0.0136 (SRC, CONV); #p: p = 0.0375 (SRC) (b); + zVAD: *p: p = 0.0046 (BR, FLASH), p = 0.0035 (ATP-linked, FLASH), p < 0.0001 (NMR, FLASH); #p: p < 0.0001 (BR), p = 0.0184 (ATP- linked), p < 0.0001 (NMR) (c); + Nec-1: *p: p = 0.0309 (BR, FLASH), p = 0.0028 (ATP-linked, FLASH); #p: p = 0.0281 (BR), p = 0.0008 (ATP- linked) (d); + Calp: *p: p = 0.0136 (BR, FLASH), p = 0.001 (ATP-linked, FLASH), p = 0.0222 (SRC, FLASH), p = 0.0387 (SRC, CONV); #p: p = 0.0003 (BR), p < 0.0001 (ATP- linked) (e).

**Fig.6** Annexin V: *p: p < 0.0001 (FLASH); #p: p < 0.0001 (a).TMRM: *p: p < 0.0001 (6, 24, 72 h, Control; 72 h, FLASH; 1, 72 h, CONV), p = 0.0024 (1h, FLASH), p = 0.005 (24 h, FLASH); #p: p < 0.0001 (6 h, FLASH); p = 0.0011 6 h, CONV) (b); CellROX: *p: p = 0.0012 (72 h, Control), p < 0.0001 (24 h, FLASH; 24 h, CONV); #p: p < 0.0001 (6 h, CONV); p < 0.0001 (FLASH, 24 h), p = 0.0014 (CONV, 24 h); $p: p =0,0007 (24 h) (c). Cell Titer-Glo: *p: p = 0.0164 (Control, 24 h), p = 0.0094 (FLASH, 24 h), p = 0.0104 (CONV, 24 h) (d). NAD+/NADH-Glo: *p: p < 0.0001 (FLASH, 24 h); #p: p < 0.0001 (FLASH, 24 h); $p: p < 0.0001 (24 h) (e). Seahorse analysis: *p: p = 0.0023 (BR, FLASH), p = 0.0033 (BR, CONV); p = 0.0023 (ATP-linked, FLASH), p = 0.0251 (ATP-linked, CONV); p = 0.0020 (MR, FLASH), p = 0.0020 (MR, CONV); p = 0.0024 (SRC, FLASH), p = 0.0009 (SRC, CONV) (f).

**Fig. S1** Experimental set-up for *in vitro* condition. (a) the PMMA applicator used in vertical configuration and (b) the plastic water slab employed.

**Fig. S2** Real-time calcium analysis after 8 Gy FLASH or CONV irradiations in healthy astrocytes. Data are mean ± SEM (n = 3 independent experiments). *p < 0.0001 *vs* Control; #p < < 0.0001 FLASH *vs* CONV (one-way ANOVA with Tukey post-test) (a - b). Clonogenic assay performed in GL261 cells following FLASH and CONV irradiation (c - d). Representative images of colonies formed in a six-well clonogenic assay after exposure to increasing radiation doses (4, 6, and 8 Gy) (c). Corresponding clonogenic survival curves with calculated IC₅₀ values for FLASH and CONV irradiation (d). Cell death and cell density at 72 h after increasing doses (4 - 16 Gy). FLASH induced greater death at 4 Gy, was iso-effective at 8 Gy, and CONV was more cytotoxic at 16 Gy. Data are mean ± SEM (n = 3 independent experiments). *p < 0.05 vs Control; #p < 0.05 between doses; $p < 0.05 FLASH vs CONV (two-way ANOVA with Tukey’s test) (e - f). Representative Hoechst/DIC images of GL261 cells at 72 h post-irradiation. Scale bar: 50 µm (g). Nuclear diameter quantification normalized to Control. Data are mean ± SEM (n = 3 independent experiments). *p < 0.05 vs Control; #p < 0.05 between doses; $p < 0.05 FLASH vs CONV (two-way ANOVA with Tukey’s test) (h). *p: (e) *p: p = 0.0011 (FLASH, 4 Gy), p < 0.0001 (FLASH, 8, 16 Gy; CONV, 8, 16 Gy); #p: p < 0.0001 (CONV 4 *vs* 8 Gy; CONV 4 *vs* 16 Gy; CONV 8 *vs* 16 Gy); $p: p = 0.05 (4 Gy), p = 0.0004 (16 Gy). (f) *p: p = 0.0333 (FLASH, 4 Gy), p = 0.0004 (FLASH, 8 Gy), p < 0.0001 (FLASH, 16 Gy; CONV, 8, 16 Gy), p = 0.0381 (CONV, 4 Gy); #p: p < 0.0001 (CONV 4 *vs* 8 Gy; CONV 4 *vs* 16 Gy). (h) *p: p < 0.0001 (FLASH, 4 Gy; CONV, 16 Gy), p = 0.0002 (FLASH, 8 Gy), p = 0.002 (FLASH, 16 Gy), p = 0.0003 (CONV, 4 Gy), p = 0.0012 (CONV, 8 Gy); #p: p = 0.0039 (FLASH 4 *vs* 8 Gy), p = 0.0181 (FLASH 4 *vs* 16 Gy); $p: p = 0.0024 (4 Gy).

**Fig. S3** Representative frequency distribution plots of mean fluorescence intensity in healthy astrocytes (a) and GL261 cells (b), illustrate the flow cytometry analysis of mitocondrial mass (MitoTracker Green, first panel), active (respiring) mitochondria (MitoTracker Red CMXROS, second panel), mitochondrial membrane potential (TMRM, third panel) and intracellular ROS levels (CellROX Green, fourth panel) at 0 1, 6, 24, and 72 h after exposure to FLASH or CONV irradiation (8 Gy).
