# Supplementary material
Source: Research Square preprint supplement (doi:10.21203/rs.3.rs-9908162/v1)
Supplement: Supplementary file 2 [file 89c37c0e0ab4f72414bf89c6.docx]

**Table 1 This table summarize the parameters used in each irradiation condition**

| **Irradiation modality** | **Dose per pulse [Gy]** | **Average dose rate** | **Average dose within a pulse** | **Pulse duration [µs]** |
| --- | --- | --- | --- | --- |
| FLASH | 1 | 240 Gy/s | 2.5105 Gy/s | 4 |
| CONV | 0.02 | 6 Gy/min | 5000 Gy/s | 4 |
