# Supplementary material
Source: Research Square preprint supplement (doi:10.21203/rs.3.rs-9908162/v1)
Supplement: Supplementary file 3 [file d5b58b1386525726af50ef4b.docx]

**Table 2 Summary of redox-mitochondrial and bioenergetic responses induced by FLASH- *versus* CONV-RT in healthy astrocytes and glioma cells.**

| **Experiment/Readout** | | **Healthy Astrocytes** | **Glioma cells** | **Interpretation** |
| --- | --- | --- | --- | --- |
| **ROS response Kinetics** | | FLASH: lower immediate ROS peak and reduced acute ROS compared with CONV; (slope of ROS increase not significantly different).  CONV: higher early ROS peak. | GL261 cells:  FLASH: lower immediate peak but more sustained ROS accumulation over time.  CONV: higher early peak but less sustained ROS accumulation. | FLASH limits acute ROS in normal cells while promoting sustained ROS accumulation in GL261 cells, indicating differential redox kinetics. |
| **Cell Death** | | Lower cell death after FLASH than CONV at 72 h. | GL261 cells:  comparable apoptotic engagement between FLASH and CONV.  U87 cells:  increased apoptotic engagement under FLASH. | FLASH spares healthy cells while maintaining or enhancing cytotoxic responses in glioma cells. |
| **Transcriptional Profiling/**  **Cell-Cycle Response** | | *p53*: modest early decrease then increase (24 - 72 h).  *p21*: strong rapid induction (peak 6 h) after FLASH, sustained.  *p16*: late increase at 72 h after FLASH.  *Bax/Bcl-2/LC3/Beclin*: no major changes observed. | GL261 cells:  *Bax*: pronounced sustained upregulation (24 h).  *Bcl-2*: transient rise at 24 h then decline in FLASH.  *p53/p21/p16*: earlier and stronger upregulation with FLASH (24, 72 h).  *LC3/Beclin1*: earlier, stronger induction with FLASH.  Enhanced G2/M accumulation. | In healthy cells, FLASH induces a cell-cycle arrest and senescence-associated transcriptional program.  In GL261 cells, FLASH induces early pro-death transcriptional responses, autophagy, and senescence programs. |
| **Flow Cytometry** | **MitoTracker Green (mass)** | MitoTracker Green decreased after both irradiation modalities; CONV remained lower, whereas FLASH recovered and modestly increased by 72 h. | GL261 cells:  Transient increase at 6 h after both, then pronounced decrease at 24 h and partial recovery at 72 h (both modalities). | FLASH better preserves mitochondrial content in healthy cells; tumor cells show transient perturbation followed by mitochondrial loss. |
| **MitoTracker Red/**  **TMRM (*ΔΨm*)** | Both: early reduction up to 6 h; FLASH shows faster recovery and better preservation at later times (6 - 72 h). | GL261 cells:  early reversible hyperpolarization at 6 h, followed by depolarization at 24 h that persisted up to 72 h; FLASH produced more pronounced *ΔΨm* loss (partially reversible at later time points).  U87 cells:  early increase in *ΔΨm* at 6 h (higher under FLASH than CONV) followed by progressive decline under both irradiation modalities. | FLASH preserves mitochondrial membrane potential in healthy cells, whereas glioma cells display an early *ΔΨm* hyperpolarization followed by stress-associated mitochondrial depolarization. |
| **CellROX** | Elevated ROS in both from 24 - 72 h; CONV higher, particularly at 24 h. | GL261 cells:  elevated ROS across time points; CONV peaks at 6 h and then declines; FLASH higher at 24 h (sustained pattern).  U87 cells:  ROS levels peak at 24 h, with significantly higher ROS accumulation under FLASH compared with CONV. | ROS dynamics differ between modalities: CONV induces an earlier ROS peak, whereas FLASH promotes more sustained ROS accumulation in glioma cells while limiting late ROS levels in healthy cells. |
| **Cellular Bioenergetic Profile** | **BR, ATP-linked, MR, SRC, NMR, proton leak, cellular ATP and NAD+ levels** | FLASH: partial preservation of BR, ATP-linked OCR, MR and especially SRC (metabolic flexibility preserved).  CONV: strong suppression of MR and SRC (near collapse). | GL261 cells:  FLASH: stronger suppression of BR, ATP-linked respiration and MR.  CONV: moderate suppression with partial recovery at later time points.  U87 cells:  reduced respiratory parameters after both modalities. ATP progressively declined after irradiation; NAD⁺ increased, more prominently after FLASH. | FLASH preserves mitochondrial respiration in healthy cells (particularly SRC) whereas glioma cells exhibit irradiation-associated metabolic stress. |
| **Inhibitors** | CONV: DPQ, Nec-1, Calpeptin partially rescue BR/ATP/MR/SRC; zVAD minimal.  FLASH: inhibitors produce no significant rescue. | GL261 cells:  CONV: DPQ restores MR and SRC (PARP role).  FLASH: DPQ minor effect; zVAD partially rescues OCR; Nec-1 improves BR/ATP in FLASH; Calpeptin selectively rescues BR/ATP. | In healthy cells, CONV dysfunction is PARP/calpain/necroptosis-driven; FLASH induces metabolic stress that is not rescued by these inhibitors.  In GL261 cells, the underlying mechanisms appear modality-specific: PARP and necroptosis dominate in CONV, while FLASH-associated vulnerability involves calpain and necroptosis pathways with partial apoptotic contribution. |
| **Overall interpretation** | | FLASH: tissue-sparing phenotype, lower acute ROS, preserved *ΔΨm*/SRC, senescence signaling, less cell death. | GL261 cells:  FLASH: tumor-vulnerable phenotype, sustained ROS, *ΔΨm* loss, early pro-death/autophagy/senescence transcription, dose-dependent cytotoxicity.  U87 cells:  FLASH: tumor-vulnerable phenotype, oxidative stress, mitochondrial dysfunction, apoptotic engagement, bioenergetic imbalance. | The FLASH effect appears tissue-selective, preserving mitochondrial integrity and stress-adaptive responses in healthy cells while inducing sustained oxidative and metabolic vulnerability in glioma cells across models. Differential mitochondrial resilience and regulated cell-death signaling likely underpin these divergent outcomes. |
